# Supplementary material for: A multicomponent nanosystem for capturing circulating tumor cells from cancer patients with PD-L1 as an immunotherapy oncotarget
Source: Royal Society of Chemistry journal article supplement (doi:10.1039/d4tb01360c), 2024-01-01
Supplement: d4tb01360c1.pdf [file d4tb01360c1.pdf]

## Multicomponent nanosystem for capturing circulating tumor cells from cancer patients with PD-L1 as an immunotherapy oncotarget

Ganesh Khutale,<sup>†a,b</sup> Saloni Andhari,<sup>†a,b</sup> Rituja Gupta,<sup>c</sup> Gourishankar Aland,<sup>a</sup> Shashwat Banerjee,<sup>a</sup> Kiran Todkar,<sup>a</sup> Milind Pore,<sup>a</sup> Vrushali Khobragade,<sup>a</sup> Alain D'Souza,<sup>a,b</sup> Narendra Kale,<sup>d</sup> Aravindan Vasudevan,<sup>a</sup> Atul Bharde,<sup>b</sup> Sreeja Jayant,<sup>a</sup> Yuvraj Patil<sup>c</sup> and Jayant Khandare<sup>\*a,b,c,e,f</sup>

<sup>a</sup> Actorius Innovations and Research, Pune 411057, India

Email: jayant@actorius.co.in

<sup>b</sup> OneCell Diagnostics, Pune 411057, India

<sup>c</sup> School of Health Sciences and Technology, Dr. Vishwanath Karad MIT World

Peace University, Kothrud, Pune 411038, India

<sup>d</sup> Center for Nanomedicine, The Johns Hopkins University School of Medicine, Baltimore, Maryland 21287, United States

<sup>e</sup> Actorius Innovations and Research, Simi Valley, CA 93063, USA

<sup>f</sup> School of Consciousness, Dr. Vishwanath Karad MIT World Peace University, Kothrud, Pune 411038, India

<sup>†</sup>Contributed equally.

### Supporting Information

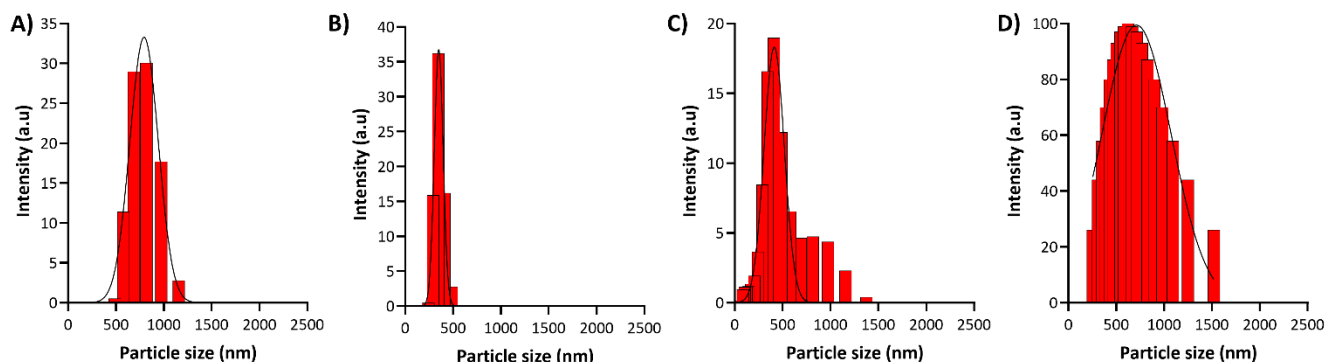

Figure S1. Particle size distribution of A) Fe<sub>3</sub>O<sub>4</sub> NPs, B) Fe-GSH NPs, C) Fe-GSH-PAMAM NPs and D) Fe-GSH-PAMAM-GO NPs.

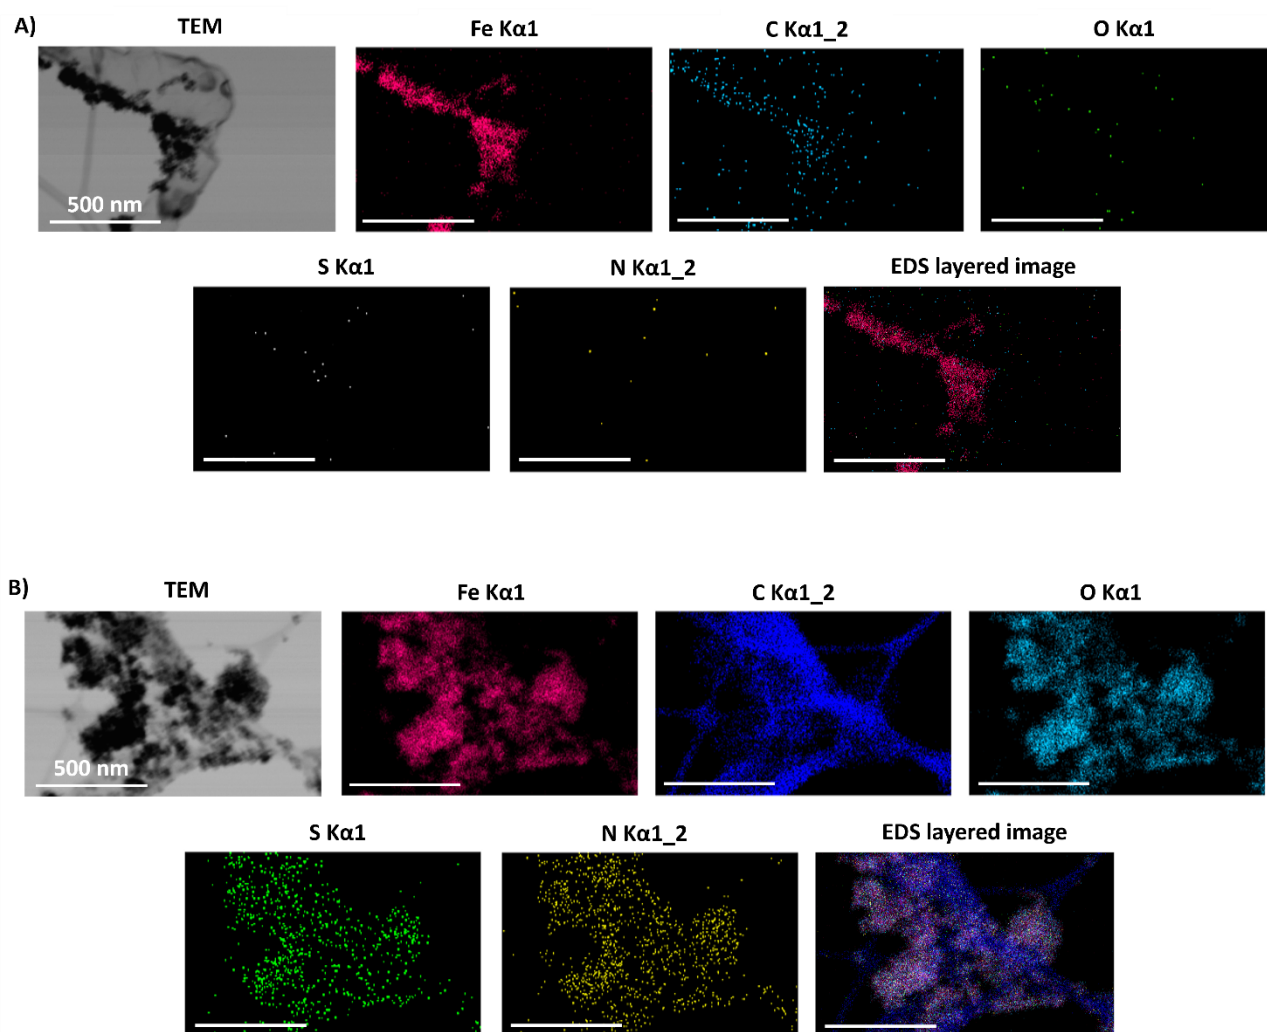

**Figure S2.** TEM micrograph and corresponding EDX maps of **A)** Fe-GSH NPs and **B)** Fe-GSH-PAMAM NPs representing the Fe, C, O, S and N content in the captured images.
